# Supplementary material
Source: ML conference proceedings conference paper supplement (https://openreview.net/forum?id=X9nDBjJDie)
Supplement: supplementary_material [file Molecule_generation.pdf › MolGeneration/Molecule_generation.pdf]

## Molecule Description

The molecule is a member of the class of biguanides that is biguanide substituted by a butyl group at position 1. It is an antidiabetic drug with potential antitumor effect. It has a role as a hypoglycemic agent, a geroprotector, a radiosensitizing agent, an antineoplastic agent and an antiviral agent. It is functionally related to a biguanide.

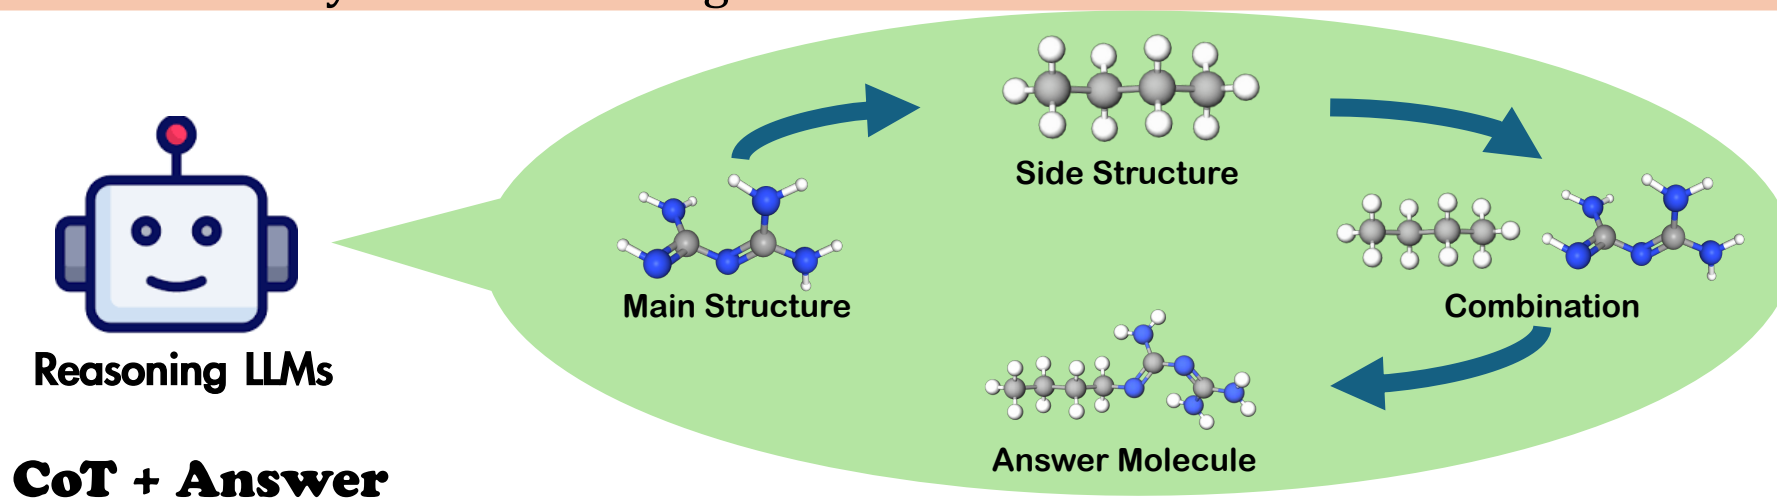

**Main Structure:** Biguanide is composed of two guanidino groups connected by a bridging nitrogen  $\text{N}=\text{C}(\text{N})\text{N}=\text{C}(\text{N})\text{N}$ .

**Side Structure:** There is a butyl group ( $\text{CH}_3\text{--CH}_2\text{--CH}_2\text{--CH}_2\text{--}$  : CCCC) substitution at position 1.

**Combination:** The carbon of the butyl chain will connect to the nitrogen of the biguanide structure.

**Answer:** CCCCN=C(N)N=C(N)N
