# Supplementary material
Source: ML conference proceedings conference paper supplement (https://openreview.net/forum?id=X9nDBjJDie)

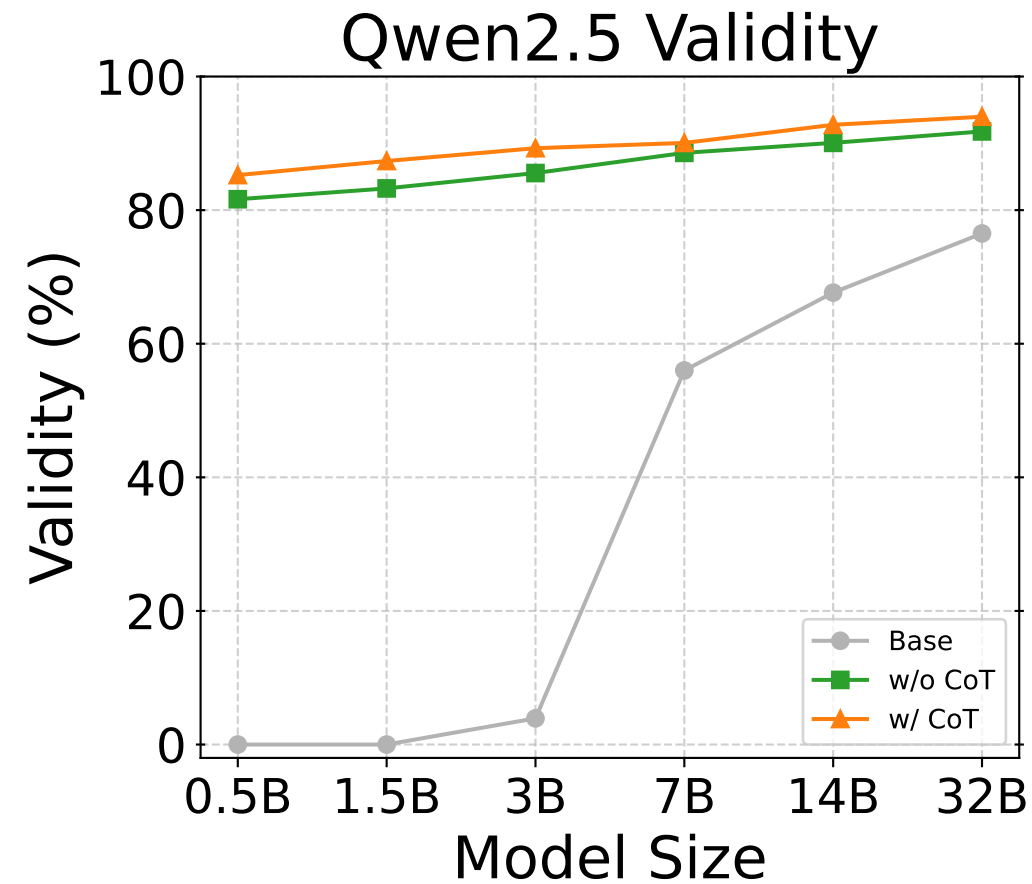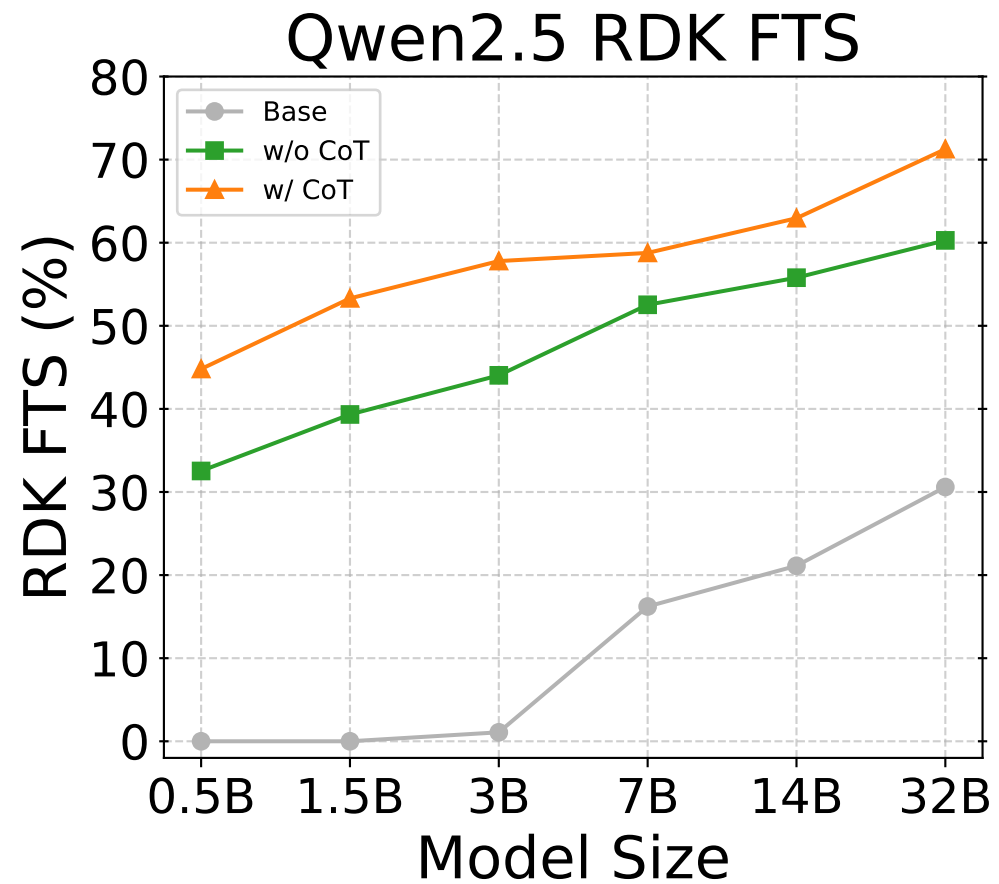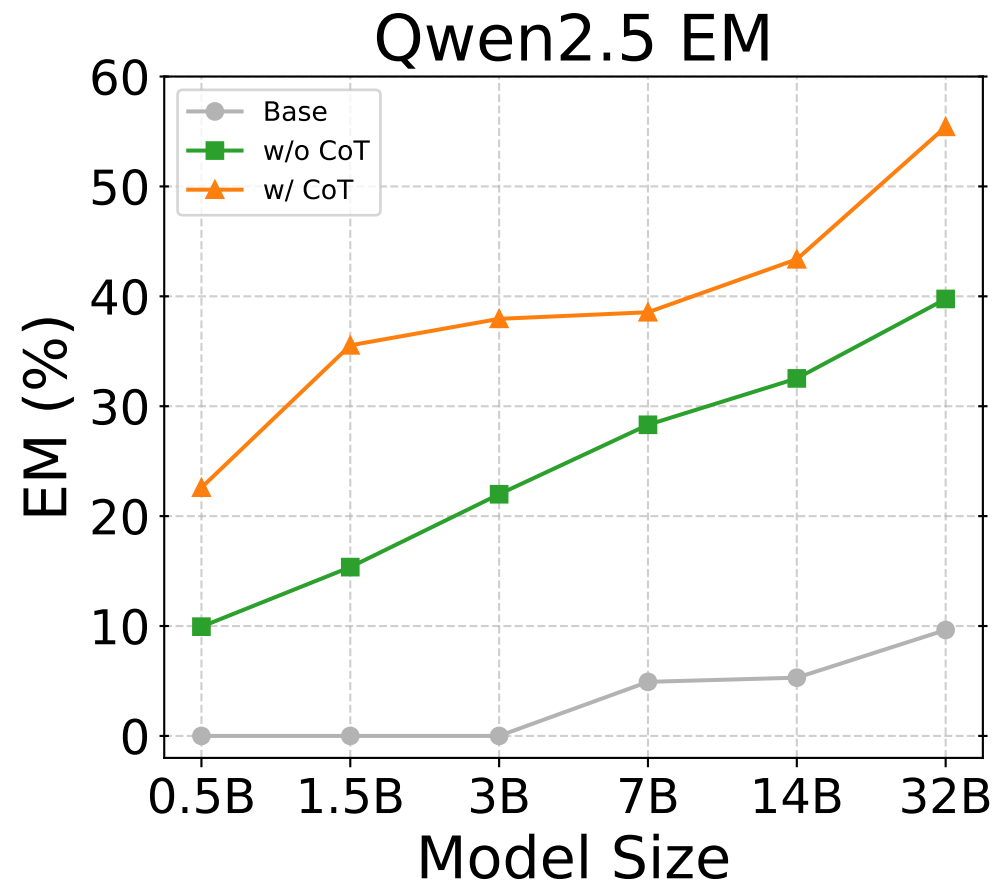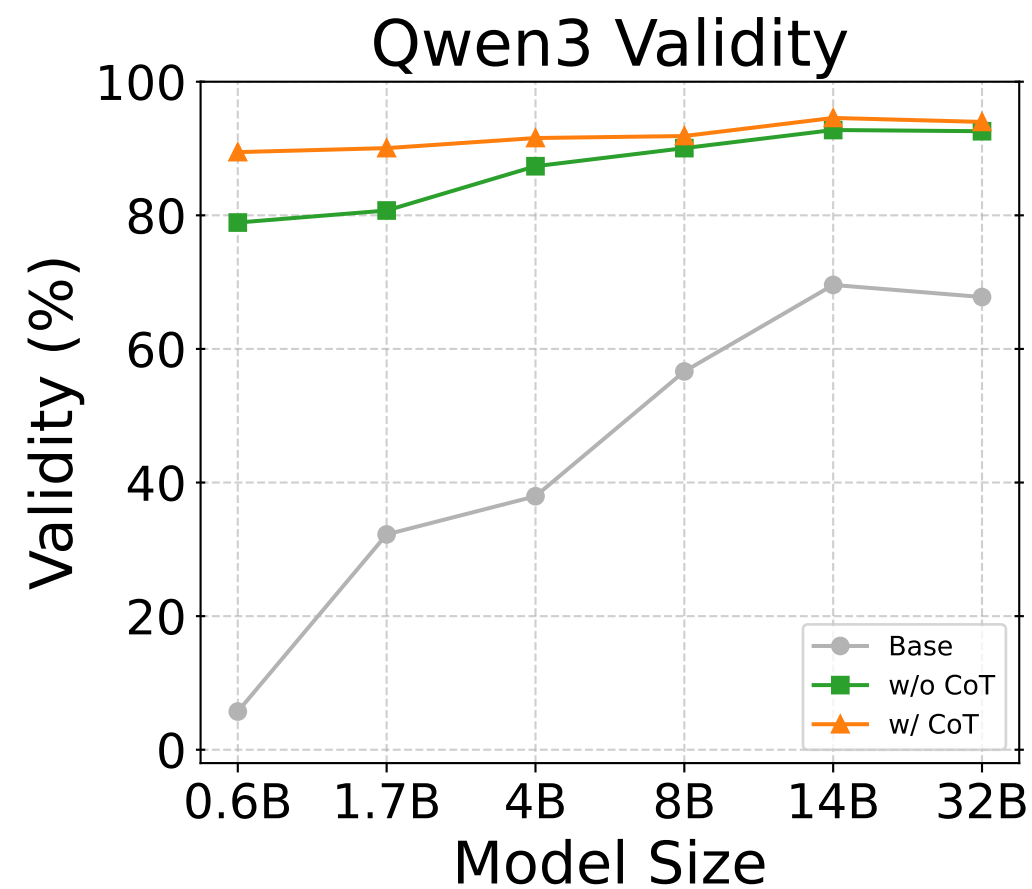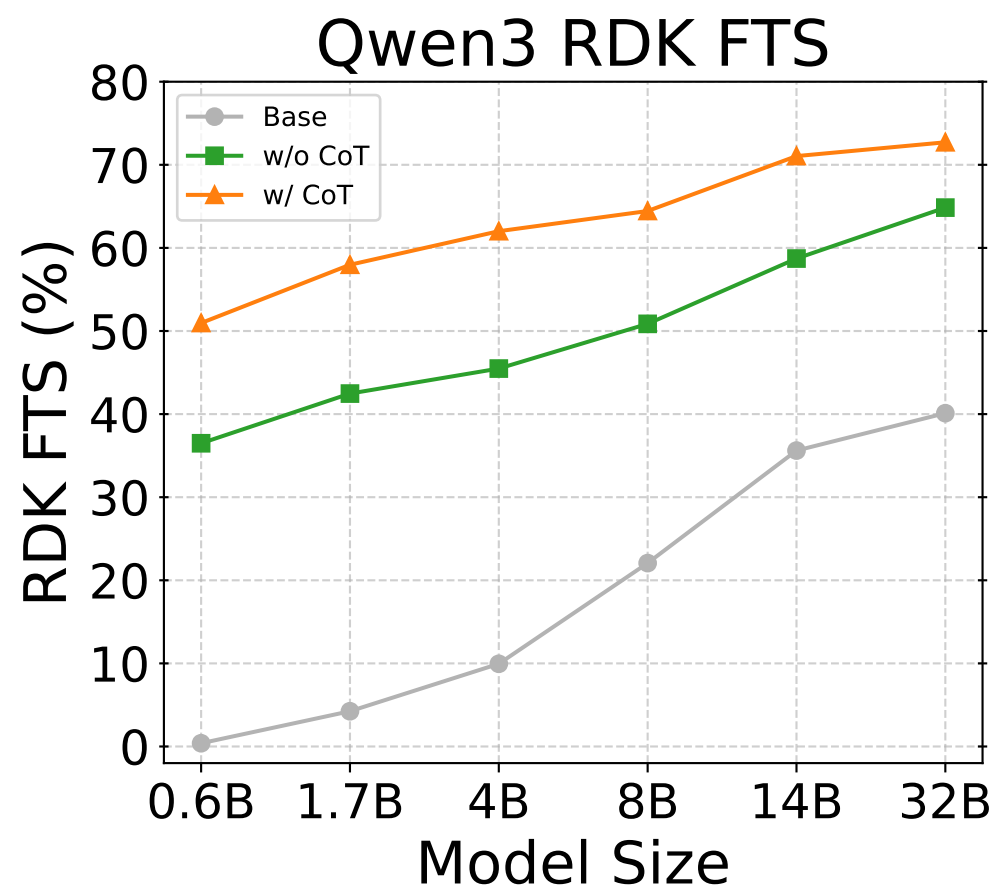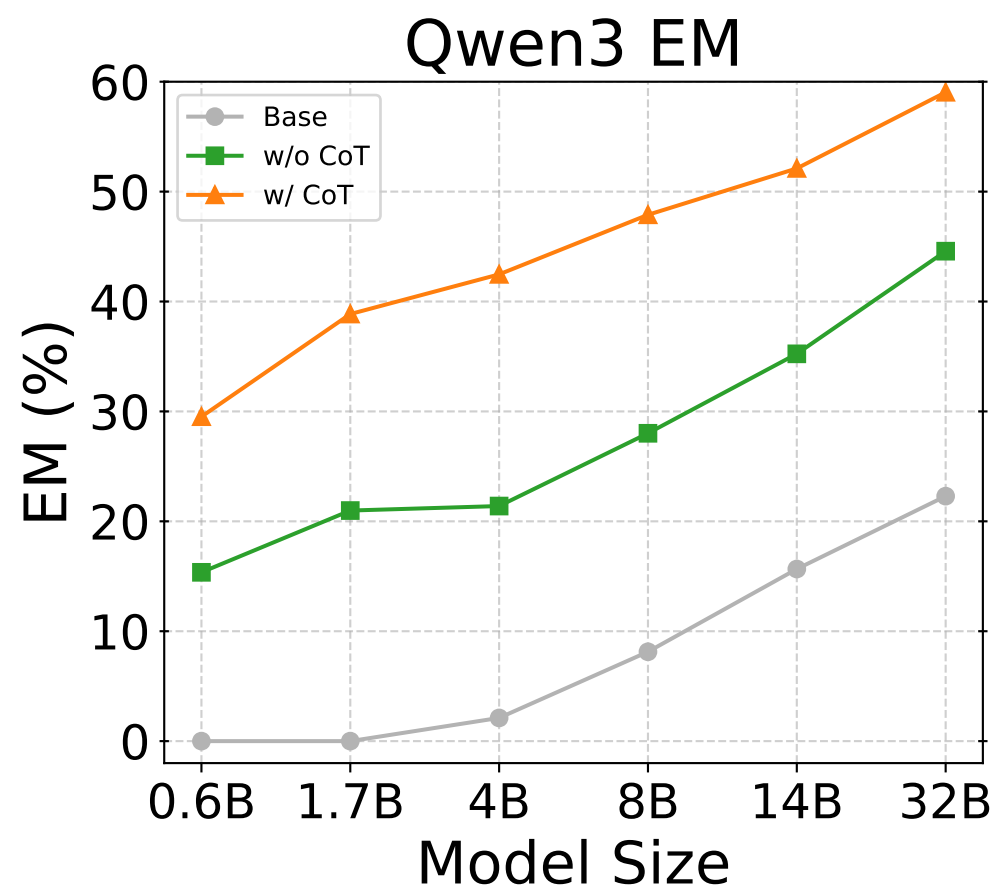

Supplement: supplementary_material [file Qwen2.5_vs_Qwen3_Validity_RDK_EM.pdf › MolGeneration/Qwen2.5_vs_Qwen3_Validity_RDK_EM.pdf]

Curation Label Distribution

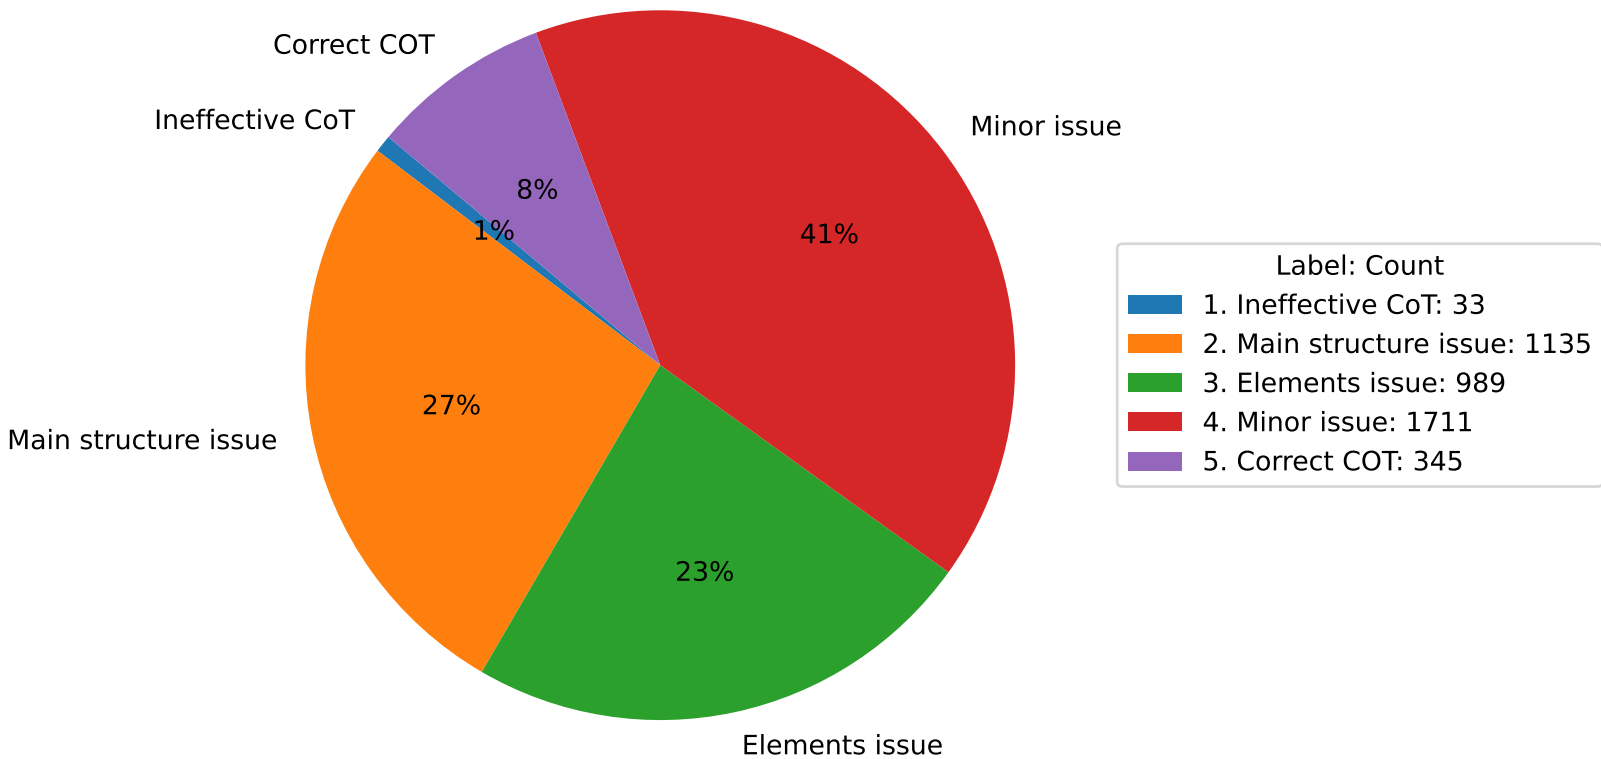

Supplement: supplementary_material [file curation_score_distribution.pdf › MolGeneration/curation_score_distribution.pdf]
